# Supplementary material
Source: Springer Nature journal article supplement (https://www.springermedizin.de/resource/supplementary/12889_2013_5948_MOESM1_ESM.pdf/9496690)

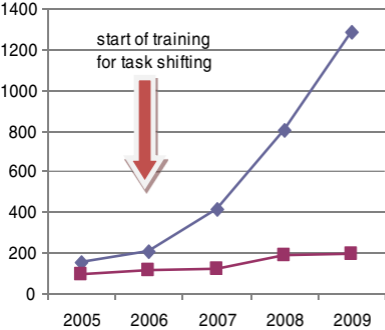

- ◆ Number of facilities offering PMTCT
- Number of sites offering VCT

Supplement: MOESM1 [file 9496690]
